# Supplementary material for: Efficacy of a Red-Light Controllable Nitric Oxide Releaser for Neurogenic Erectile Dysfunction: A Study Using a Rat Model of Cavernous Nerve Injury
Source: PubMed Central journal article supplement — World J Mens Health. 2023 Jan 3;41(4):909–19. doi: 10.5534/wjmh.220146 (PMC10523118; doi:10.5534/wjmh.220146), 2023-01-03
Supplement: wjmh-41-909-s002.pdf [file wjmh-41-909-s002.pdf]

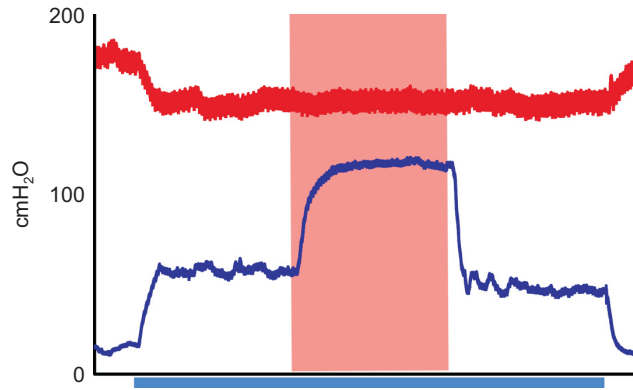

**Supplement Fig. 1.** Intracavernous pressure (ICP) and arterial pressure charts during electrostimulation and red-light irradiation in the middle of electrostimulation. ICP (blue line) and arterial pressure (red line) chart during electrostimulation of cavernous nerve in intact 12 week-old rats. Before the electrostimulation, 100  $\mu$ L ( $10^{-4}$  M) NORD-1 was injected into penis. In the middle of electrostimulation, 630–690 nm light (115 mW) was irradiated to penis at a distance of 2 cm from penis. The electrostimulation period is represented by blue thicker bar along time axis. Light irradiation period is indicated by the red back ground.
