# Supplementary material for: Efficacy of a Red-Light Controllable Nitric Oxide Releaser for Neurogenic Erectile Dysfunction: A Study Using a Rat Model of Cavernous Nerve Injury
Source: PubMed Central journal article supplement — World J Mens Health. 2023 Jan 3;41(4):909–19. doi: 10.5534/wjmh.220146 (PMC10523118; doi:10.5534/wjmh.220146), 2023-01-03
Supplement: wjmh-41-909-s003.pdf [file wjmh-41-909-s003.pdf]

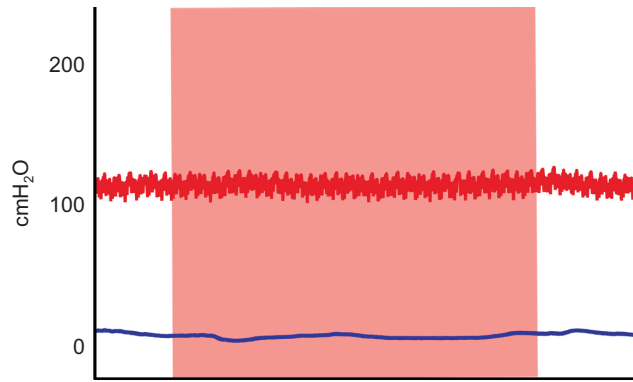

**Supplement Fig. 2.** Intracavernous pressure (ICP) and arterial pressure charts during red-light irradiation with penis. ICP (blue line) and arterial pressure (red line) chart during 630–690 nm light (115 mW) irradiation at a distance of 2 cm from penis in intact 12 weeks-old rats. Before the light irradiation, 100  $\mu$ L ( $10^{-4}$  M) NORD-1 was injected into penis. Light irradiation period is indicated by the red background.
