# Supplementary material for: Efficacy of a Red-Light Controllable Nitric Oxide Releaser for Neurogenic Erectile Dysfunction: A Study Using a Rat Model of Cavernous Nerve Injury
Source: PubMed Central journal article supplement — World J Mens Health. 2023 Jan 3;41(4):909–19. doi: 10.5534/wjmh.220146 (PMC10523118; doi:10.5534/wjmh.220146), 2023-01-03
Supplement: wjmh-41-909-s004.pdf [file wjmh-41-909-s004.pdf]

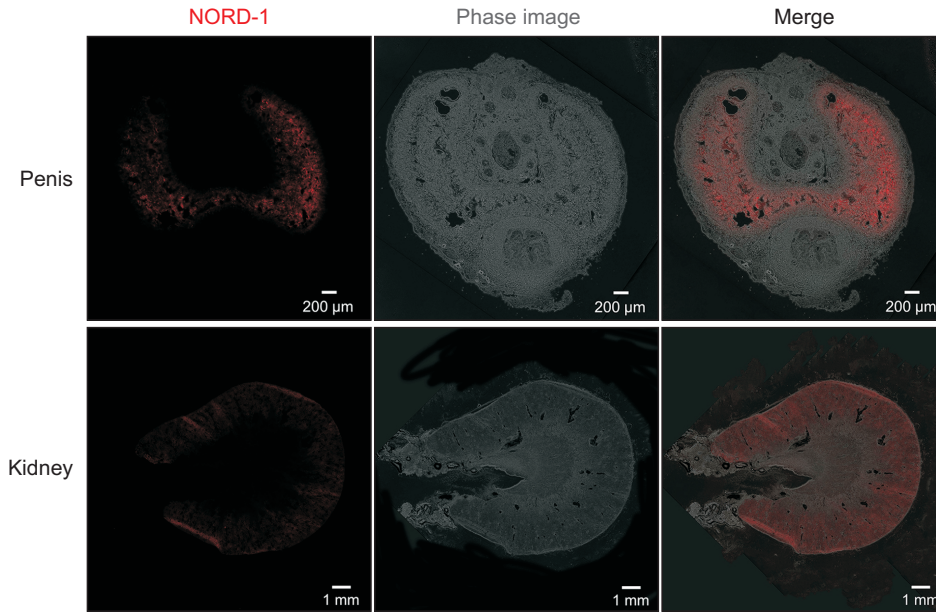

**Supplement Fig. 3.** Localization of NORD-1 in the penis and kidney. Representative image of penis (upper) and kidney (lower) 1 hour after NORD-1 (100 μL,  $10^{-4}$  M) injection into the crura of the penis. NORD-1 fluorescence was detected by approximately 620 nm excitation light. White bar in each image represents scale bar (penis: 200 μm, kidney: 1 mm).
